# Supplementary material for: Protease-sensitive atelocollagen hydrogels promote healing in a diabetic wound model
Source: Royal Society of Chemistry journal article supplement (doi:10.1039/c6tb02268e), 2016-01-01
Supplement: c6tb02268e1.pdf [file c6tb02268e1.pdf]

## Supporting information

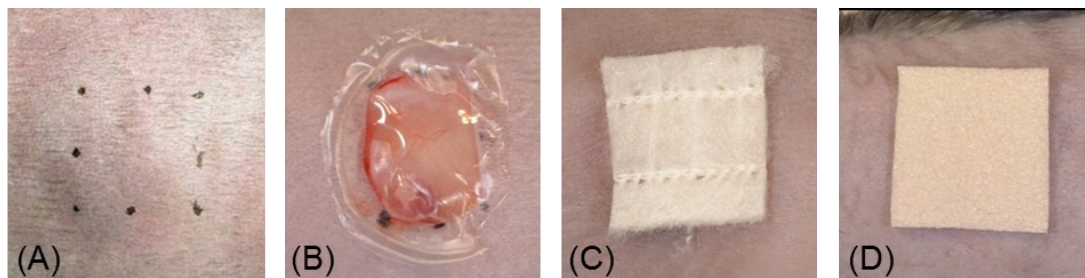

**Figure S1.** (A-D): digital macrographs taken during in vivo surgery. (A): The mouse dorsum was shaved and incised to create a 10×10 mm wound (A). (B-D): AC hydrogel (B) and two commercial dressings, i.e. Aquacel<sup>®</sup> (C) and Mepilex<sup>®</sup> (D), were applied on the top of the wound. Samples were replaced every four days over a 20-d time window.

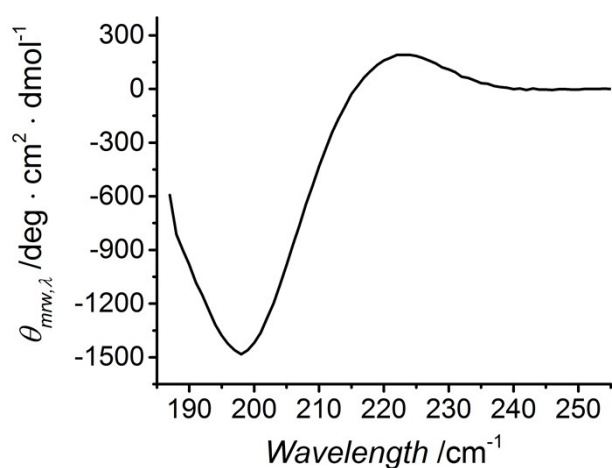

**Figure S2.** Far-UV CD spectrum of AC solution in 10 mM HCl. 195-200 and 220-225 nm peaks are clearly detected, confirming the presence of collagen polyproline II and triple helices, respectively.
